# Supplementary material for: Chronic Sublethal Aluminum Exposure and Avena fatua Caryopsis Colonization Influence Gene Expression of Fusarium avenaceum F.a.1
Source: Front Microbiol. 2020 Feb 4;11:51. doi: 10.3389/fmicb.2020.00051 (PMC7010643; doi:10.3389/fmicb.2020.00051)
Supplement: Supplementary file 3 [file Table_3.XLSX]

## Sheet: Sheet1
Transcrtipt ID	Repressed in sets	Swiss-prot	GenBank Blastx
KIL88379.1	1,3	-//-	RFN44918.1 secreted protein [Fusarium sp. FIESC_12]
KIL88378.1	1	-//-	RFN44919.1 secreted protein [Fusarium sp. FIESC_12]
KIL88377.1	1,3	-//-	RFN44920.1 secreted protein [Fusarium sp. FIESC_12]
KIL86429.1	1	-//-	KIL86429.1 hypothetical protein FAVG1_10258 [Fusarium avenaceum]
KIL94396.1	1	sp|P40445|YIQ6_YEAST Uncharacterized transporter YIL166C OS=Saccharomyces cerevisiae (strain ATCC 204508 / S288c) GN=YIL166C PE=1 SV=1//4.8717e-48	SCO81694.1 related to nicotinamide mononucleotide permease [Fusarium oxysporum]
KIL94330.1	1	sp|P94400|YCIC_BACSU Putative metal chaperone YciC OS=Bacillus subtilis (strain 168) GN=yciC PE=2 SV=1//9.68201e-08	SCO15534.1 related to dopamine-responsive protein [Fusarium fujikuroi]
KIL87156.1	1	-//-	SCO15534.1 related to dopamine-responsive protein [Fusarium fujikuroi]
KIL87810.1	1	-//-	KIL87810.1 hypothetical protein FAVG1_08689 [Fusarium avenaceum]
KIL84675.1	1	-//-	KIL84675.1 hypothetical protein FAVG1_12202 [Fusarium avenaceum]
KIL88275.1	1	-//-	KIL88275.1 hypothetical protein FAVG1_08354 [Fusarium avenaceum]
KIL84093.1	1,2	-//-	RFN45536.1 esterase, sgnh hydrolase-type, subgroup [Fusarium sp. FIESC_12]
KIL88383.1	1,3	-//-	RFN48492.1 bnr repeat-containing glycosyl hydrolase [Fusarium sp. FIESC_12]
KIL90176.1	1,3	sp|P08158|AMDS_EMENI Acetamidase OS=Emericella nidulans (strain FGSC A4 / ATCC 38163 / CBS 112.46 / NRRL 194 / M139) GN=amdS PE=2 SV=1//0	KIL90176.1 amidase signature enzyme [Fusarium avenaceum]
KIL88814.1	1	-//-	KIL88814.1 hypothetical protein FAVG1_08063 [Fusarium avenaceum]
KIL87147.1	1	sp|O74524|PROD_SCHPO Probable proline dehydrogenase, mitochondrial OS=Schizosaccharomyces pombe (strain 972 / ATCC 24843) GN=SPCC70.03c PE=3 SV=1//7.0541e-33	KIL87147.1 proline oxidase [Fusarium avenaceum]
KIL88502.1	1,3	sp|P63872|CYSK_STAAW Cysteine synthase OS=Staphylococcus aureus (strain MW2) GN=cysK PE=3 SV=1//1.94363e-62	GAQ45566.1 pyridoxal phosphate-dependent enzyme [Aspergillus niger]
KIL87148.1	1	sp|A3KG59|P20D2_MOUSE Peptidase M20 domain-containing protein 2 OS=Mus musculus GN=Pm20d2 PE=1 SV=1//6.94966e-73	KIL87148.1 amidohydrolase family protein [Fusarium avenaceum]
KIL87670.1	1	-//-	CVK95622.1 related to integral membrane protein PTH11 [Fusarium mangiferae]
KIL87154.1	1	sp|P24552|OXDA_FUSSO D-amino-acid oxidase OS=Fusarium solani subsp. pisi PE=1 SV=1//2.54152e-171	EWZ41596.1 D-amino-acid oxidase [Fusarium oxysporum Fo47]
KIL87149.1	1	sp|Q92413|OAT_EMENI Ornithine aminotransferase OS=Emericella nidulans (strain FGSC A4 / ATCC 38163 / CBS 112.46 / NRRL 194 / M139) GN=otaA PE=3 SV=2//0	KPA38353.1 ornithine aminotransferase [Fusarium langsethiae]
KIL87152.1	1	sp|Q84MB6|DIOX2_ARATH Probable 2-oxoglutarate-dependent dioxygenase At3g49630 OS=Arabidopsis thaliana GN=At3g50210 PE=2 SV=1//9.90689e-15	CVK98945.1 related to naringenin,2-oxoglutarate 3-dioxygenase [Fusarium mangiferae]
KIL87155.1	1	-//-	RGP59219.1 sulfotransferase family domain-containing protein [Fusarium sporotrichioides]
KIL86311.1	1,3	sp|D4ARV2|AIM6_ARTBC Altered inheritance of mitochondria protein 6 homolog ARB_06966 OS=Arthroderma benhamiae (strain ATCC MYA-4681 / CBS 112371) GN=ARB_06966 PE=1 SV=1//3.01355e-30	KIL86311.1 altered inheritance of mitochondria protein 6 [Fusarium avenaceum]
KIL90234.1	1,3	-//-	RGP80677.1 bys1 protein [Fusarium longipes]
KIL95720.1	1,3	sp|P38094|FLUG_EMENI Protein fluG OS=Emericella nidulans (strain FGSC A4 / ATCC 38163 / CBS 112.46 / NRRL 194 / M139) GN=fluG PE=1 SV=1//1.46665e-12	KIL95720.1 glutamine synthetase [Fusarium avenaceum]
KIL85999.1	1	sp|Q96WQ9|EGLD_ASPKW Probable endo-beta-1,4-glucanase D OS=Aspergillus kawachii (strain NBRC 4308) GN=eglD PE=3 SV=1//1.35835e-16	ENH74816.1 Putative endo-beta-1,4-glucanase D [Fusarium oxysporum f. sp. cubense race 1]
KIL87511.1	1	-//-	KIL87511.1 hypothetical protein FAVG1_09218 [Fusarium avenaceum]
KIL88384.1	1,3,4	-//-	KPA38249.1 cell surface protein mas1 [Fusarium langsethiae]
KIL84622.1	2	sp|C8ZI10|RSB1_YEAS8 Sphingoid long-chain base transporter RSB1 OS=Saccharomyces cerevisiae (strain Lalvin EC1118 / Prise de mousse) GN=RSB1 PE=3 SV=1//8.52149e-37	KIL84622.1 sphingoid long-chain base transporter rsb1 [Fusarium avenaceum]
KIL94236.1	2,4	-//-	XP_018173581.1 tat pathway signal sequence [Purpureocillium lilacinum]
KIL92247.1	2,4	sp|Q8HYJ9|FMO3_BOVIN Dimethylaniline monooxygenase [N-oxide-forming] 3 OS=Bos taurus GN=FMO3 PE=2 SV=1//1.13994e-38	KIL92247.1 flavin depend monooxygenase that catalyses the oxidation of rubrofusarin to 9-hydroxyrubrofusarin [Fusarium avenaceum]
KIL84667.1	2	-//-	PTD11101.1 putative glycosyl hydrolase [Fusarium culmorum]
KIL85974.1	2	-//-	RFN49492.1 acriflavine sensitivity control protein acr-2 [Fusarium sp. FIESC_12]
KIL89396.1	2	sp|Q9UQY0|OMTB_ASPPA Demethylsterigmatocystin 6-O-methyltransferase OS=Aspergillus parasiticus GN=omtB PE=1 SV=2//6.29558e-38	KZM24023.1 O-methyltransferase [Ascochyta rabiei]
KIL90079.1	2	sp|Q9U1Y5|CHK2_CAEEL Serine/threonine-protein kinase chk-2 OS=Caenorhabditis elegans GN=chk-2 PE=2 SV=2//8.30973e-14	KIL90079.1 serine threonine protein kinase [Fusarium avenaceum]
KIL93837.1	2	sp|B2AC45|MEP1_PODAN Extracellular metalloprotease PODANS_2_14170 OS=Podospora anserina (strain S / ATCC MYA-4624 / DSM 980 / FGSC 10383) GN=PODANS_2_14170 PE=3 SV=1//2.36396e-52	KPA39962.1 metalloprotease mep1 [Fusarium langsethiae]
KIL90109.1	2	sp|P53048|MAL11_YEAST General alpha-glucoside permease OS=Saccharomyces cerevisiae (strain ATCC 204508 / S288c) GN=MAL11 PE=1 SV=1//1.66125e-153	SCV50403.1 probable transporter (major facilitator superfamily) [Fusarium fujikuroi]
KIL93310.1	2	sp|Q503M4|MT12B_DANRE Monocarboxylate transporter 12-B OS=Danio rerio GN=slc16a12b PE=2 SV=1//3.75839e-12	KIL93310.1 monocarboxylate transporter 10 [Fusarium avenaceum]
KIL94231.1	2	-//-	KIL94231.1 hypothetical protein FAVG1_02793 [Fusarium avenaceum]
KIL85823.1	2	sp|O94562|YGD3_SCHPO Uncharacterized aminotransferase C1771.03c OS=Schizosaccharomyces pombe (strain 972 / ATCC 24843) GN=SPBC1773.03c PE=3 SV=1//2.55872e-127	PTD09969.1 putative aminotransferase [Fusarium culmorum]
KIL89101.1	2	-//-	KIL89101.1 hypothetical protein FAVG1_07495 [Fusarium avenaceum]
KIL86010.1	2	-//-	KIL86010.1 hypothetical protein FAVG1_10980 [Fusarium avenaceum]
KIL87162.1	2	-//-	KIL87162.1 hypothetical protein FAVG1_09716 [Fusarium avenaceum]
KIL90080.1	2	-//-	KIL90080.1 hypothetical protein FAVG1_06818 [Fusarium avenaceum]
KIL85889.1	2	-//-	KIL85889.1 hypothetical protein FAVG1_10858 [Fusarium avenaceum]
KIL88581.1	2	sp|P53608|ARGI_BACCD Arginase OS=Bacillus caldovelox GN=rocF PE=1 SV=1//3.39616e-07	KPA36204.1 arginase family protein [Fusarium langsethiae]
KIL92179.1	2	sp|Q9URX1|YLX5_SCHPO UNC93-like protein C922.05c OS=Schizosaccharomyces pombe (strain 972 / ATCC 24843) GN=SPAC922.05c PE=3 SV=1//6.62538e-114	CVK91309.1 probable DUF895 domain membrane protein [Fusarium mangiferae]
KIL88216.1	2	sp|Q12608|STCB_EMENI Probable sterigmatocystin biosynthesis P450 monooxygenase STCB OS=Emericella nidulans (strain FGSC A4 / ATCC 38163 / CBS 112.46 / NRRL 194 / M139) GN=stcB PE=3 SV=2//1.3066e-48	PTD06293.1 putative sterigmatocystin biosynthesis P450 monooxygenase STCB [Fusarium culmorum]
KIL94112.1	2	sp|P25036|YSP3_YEAST Subtilisin-like protease 3 OS=Saccharomyces cerevisiae (strain ATCC 204508 / S288c) GN=YSP3 PE=2 SV=2//6.03471e-23	PTD08106.1 Subtilisin-like protein protease 3 [Fusarium culmorum]
KIL87571.1	2	-//-	KIL87571.1 hypothetical protein FAVG1_09279 [Fusarium avenaceum]
KIL86503.1	2	-//-	KIL86503.1 hypothetical protein FAVG1_10333 [Fusarium avenaceum]
KIL87588.1	2	-//-	RFU82156.1 aminoglycoside phosphotransferase [Trichoderma arundinaceum]
KIL90500.1	2	sp|O66689|Y364_AQUAE RutC family protein aq_364 OS=Aquifex aeolicus (strain VF5) GN=aq_364 PE=3 SV=1//1.10973e-06	KPA38444.1 endoribonuclease l-psp family protein [Fusarium langsethiae]
KIL85441.1	2	-//-	KIL85441.1 hypothetical protein FAVG1_11398 [Fusarium avenaceum]
KIL85249.1	2	-//-	KIL85249.1 metalloprotease protein [Fusarium avenaceum]
KIL87465.1	2	-//-	EMT71294.1 Putative cell division cycle ATPase [Fusarium oxysporum f. sp. cubense race 4]
KIL91322.1	2	sp|Q54DY9|BCS1B_DICDI Probable mitochondrial chaperone BCS1-B OS=Dictyostelium discoideum GN=bcsl1b PE=3 SV=1//6.00178e-13	KIL91322.1 mitochondrial chaperone bcs1 [Fusarium avenaceum]
KIL87830.1	2,4	sp|O75881|CP7B1_HUMAN 25-hydroxycholesterol 7-alpha-hydroxylase OS=Homo sapiens GN=CYP7B1 PE=1 SV=2//1.52e-23	KIL87830.1 cytochrome p450 [Fusarium avenaceum]
KIL94055.1	2	-//-	RGP71010.1 f-box skp2 [Fusarium sporotrichioides]
KIL92529.1	2	-//-	KIL92529.1 hypothetical protein FAVG1_03708 [Fusarium avenaceum]
KIL94035.1	2	sp|D4ANB6|CBPYB_ARTBC Carboxypeptidase Y homolog ARB_05721 OS=Arthroderma benhamiae (strain ATCC MYA-4681 / CBS 112371) GN=ARB_05721 PE=1 SV=1//8.33964e-172	KPA37420.1 carboxypeptidase y [Fusarium langsethiae]
KIL87412.1	2	-//-	KIL87412.1 alcohol dehydrogenase 1 [Fusarium avenaceum]
KIL91025.1	2	-//-	KIL91025.1 hypothetical protein FAVG1_05721 [Fusarium avenaceum]
KIL93925.1	2	sp|O59741|YN25_SCHPO Uncharacterized transcriptional regulatory protein C530.05 OS=Schizosaccharomyces pombe (strain 972 / ATCC 24843) GN=SPBC530.05 PE=3 SV=2//7.55674e-08	SCV52073.1 related to transcriptional activator Mut3p [Fusarium fujikuroi]
KIL86200.1	2	sp|D4AYG1|KLDC1_ARTBC Kelch repeat-containing protein ARB_01230 OS=Arthroderma benhamiae (strain ATCC MYA-4681 / CBS 112371) GN=ARB_01230 PE=1 SV=1//2.06589e-31	PTD07846.1 Kelch repeat-containing protein [Fusarium culmorum]
KIL90821.1	2	sp|Q99518|FMO2_HUMAN Dimethylaniline monooxygenase [N-oxide-forming] 2 OS=Homo sapiens GN=FMO2 PE=1 SV=4//9.68548e-35	KPA46922.1 dimethylaniline monooxygenase 2 [Fusarium langsethiae]
KIL84105.1	2	-//-	KPA39049.1 major allergen alt [Fusarium langsethiae]
KIL94286.1	2,4	sp|Q08902|YO378_YEAST Drug resistance protein YOR378W OS=Saccharomyces cerevisiae (strain ATCC 204508 / S288c) GN=YOR378W PE=1 SV=1//5.37036e-40	RGP73940.1 aminotriazole resistance [Fusarium sporotrichioides]
KIL84104.1	2	sp|P38090|AGP2_YEAST General amino acid permease AGP2 OS=Saccharomyces cerevisiae (strain ATCC 204508 / S288c) GN=AGP2 PE=1 SV=1//2.21574e-112	ENH66604.1 General amino acid permease AGP2 [Fusarium oxysporum f. sp. cubense race 1]
KIL94224.1	2	sp|Q00357|TOXA_COCCA Putative HC-toxin efflux carrier TOXA OS=Cochliobolus carbonum GN=TOXA PE=3 SV=1//1.68587e-76	EMT69624.1 Putative HC-toxin efflux carrier TOXA [Fusarium oxysporum f. sp. cubense race 4]
KIL87655.1	2	sp|P36091|DCW1_YEAST Mannan endo-1,6-alpha-mannosidase DCW1 OS=Saccharomyces cerevisiae (strain ATCC 204508 / S288c) GN=DCW1 PE=1 SV=1//1.60467e-68	SCO76911.1 related to Zn(II)Cys6 transcriptional activator [Fusarium oxysporum]
KIL91121.1	2	sp|Q96VJ7|DHE4_GIBFU NADP-specific glutamate dehydrogenase OS=Gibberella fujikuroi GN=GDH2 PE=3 SV=1//0	KIL91121.1 nadp-specific glutamate dehydrogenase [Fusarium avenaceum]
KIL86535.1	2	-//-	RGP77361.1 ammonia transport outward 2 [Fusarium longipes]
KIL86550.1	2	-//-	RGP78426.1 transcription factor [Fusarium longipes]
KIL91080.1	2	sp|P49384|ADH3_KLULA Alcohol dehydrogenase 3, mitochondrial OS=Kluyveromyces lactis (strain ATCC 8585 / CBS 2359 / DSM 70799 / NBRC 1267 / NRRL Y-1140 / WM37) GN=ADH3 PE=3 SV=2//4.82764e-43	KPA43125.1 alcohol dehydrogenase 5 [Fusarium langsethiae]
KIL88200.1	2	-//-	KIL88200.1 hypothetical protein FAVG1_08278 [Fusarium avenaceum]
KIL92158.1	2	sp|A1DGM6|EXGB_NEOFI Probable glucan endo-1,6-beta-glucosidase B OS=Neosartorya fischeri (strain ATCC 1020 / DSM 3700 / FGSC A1164 / NRRL 181) GN=exgB PE=3 SV=1//1.55301e-84	PTD05540.1 putative glucan endo-1,6-beta-glucosidase B [Fusarium culmorum]
KIL94037.1	2	-//-	XP_023453385.1 putative transmembrane protein [Cercospora beticola]
KIL85529.1	2	sp|Q84CG1|CAMYS_STRVI Capreomycidine synthase OS=Streptomyces vinaceus GN=vioD PE=1 SV=1//4.25147e-31	KPA36518.1 aspartate aminotransferase [Fusarium langsethiae]
KIL93965.1	2	sp|Q7D745|Y2525_MYCTO Putative trans-acting enoyl reductase MT2525 OS=Mycobacterium tuberculosis (strain CDC 1551 / Oshkosh) GN=MT2525 PE=3 SV=2//9.82205e-14	PTD01232.1 Trans-acting enoyl reductase [Fusarium culmorum]
KIL87483.1	2	sp|G5E8K5|ANK3_MOUSE Ankyrin-3 OS=Mus musculus GN=Ank3 PE=1 SV=1//3.16872e-08	ENH73299.1 Ankyrin repeat and KH domain-containing protein 1 [Fusarium oxysporum f. sp. cubense race 1]
KIL84546.1	2	-//-	SCO42619.1 related to beta-1,3-glucan binding protein [Fusarium fujikuroi]
KIL89040.1	2	-//-	KPA38438.1 integral membrane protein [Fusarium langsethiae]
KIL89109.1	2	-//-	KIL89109.1 hypothetical protein FAVG1_07503 [Fusarium avenaceum]
KIL85507.1	3,4	-//-	KIL89969.1 hypothetical protein FAVG1_06706 [Fusarium avenaceum]
KIL86455.1	3	sp|Q4WAZ9|NRP14_ASPFU Nonribosomal peptide synthetase 14 OS=Neosartorya fumigata (strain ATCC MYA-4609 / Af293 / CBS 101355 / FGSC A1100) GN=NRPS14 PE=2 SV=2//0	KIL86455.1 polyketide synthetase [Fusarium avenaceum]
KIL88493.1	3	sp|A1DA60|FTMC_NEOFI Tryprostatin B 6-hydroxylase OS=Neosartorya fischeri (strain ATCC 1020 / DSM 3700 / FGSC A1164 / NRRL 181) GN=ftmP450-1 PE=3 SV=1//7.53151e-35	KPA38210.1 benzoate 4-monooxygenase cytochrome p450 [Fusarium langsethiae]
KIL85506.1	3,4	sp|P07524|TYRO_STRAT Tyrosinase OS=Streptomyces antibioticus GN=melC2 PE=3 SV=2//5.09275e-11	KIL85506.1 amino acid transporter protein [Fusarium avenaceum]
KIL88499.1	3	sp|Q9Y885|TOXF_COCCA Putative branched-chain-amino-acid aminotransferase TOXF OS=Cochliobolus carbonum GN=TOXF PE=3 SV=1//1.85766e-143	KIL88499.1 branched-chain-amino-acid aminotransferase [Fusarium avenaceum]
KIL88595.1	3	sp|Q9D2R0|AACS_MOUSE Acetoacetyl-CoA synthetase OS=Mus musculus GN=Aacs PE=1 SV=1//4.22647e-172	KIL88595.1 acetoacetate- ligase [Fusarium avenaceum]
KIL84922.1	3	sp|Q8J130|TYRO_ASPFU Tyrosinase OS=Neosartorya fumigata (strain ATCC MYA-4609 / Af293 / CBS 101355 / FGSC A1100) GN=tyr1 PE=3 SV=2//2.02759e-95	CVL12101.1 related to tyrosinase precursor [Fusarium proliferatum]
KIL88592.1	3	-//-	RGP78615.1 ycii-related domain [Fusarium longipes]
KIL88590.1	3	sp|P40806|PKSJ_BACSU Polyketide synthase PksJ OS=Bacillus subtilis (strain 168) GN=pksJ PE=1 SV=3//2.38099e-29	KIL88590.1 polyketide synthase [Fusarium avenaceum]
KIL86453.1	3	sp|Q9Y758|CP52M_DEBHN Cytochrome P450 52A13 OS=Debaryomyces hansenii GN=CYP52A13 PE=2 SV=1//1.69099e-73	KIL86453.1 cytochrome p450 52a12 [Fusarium avenaceum]
KIL89464.1	3	-//-	KIL89464.1 hypothetical protein FAVG1_07044 [Fusarium avenaceum]
KIL93007.1	3	-//-	CVK99302.1 related to integral membrane protein pth11 [Fusarium mangiferae]
KIL84575.1	3	sp|O13289|CATA_CANAL Peroxisomal catalase OS=Candida albicans (strain SC5314 / ATCC MYA-2876) GN=CTA1 PE=2 SV=4//3.11586e-120	KIL84575.1 catalase [Fusarium avenaceum]
KIL88596.1	3	-//-	KIL88596.1 hypothetical protein FAVG1_07841 [Fusarium avenaceum]
KIL88495.1	3	sp|O13317|TRI11_FUSSP Isotrichodermin C-15 hydroxylase OS=Fusarium sporotrichioides GN=TRI11 PE=3 SV=1//6.76464e-27	KIL88495.1 benzoate 4-monooxygenase cytochrome p450 [Fusarium avenaceum]
KIL86312.1	3	sp|Q9UTR6|OCH1_SCHPO Initiation-specific alpha-1,6-mannosyltransferase OS=Schizosaccharomyces pombe (strain 972 / ATCC 24843) GN=och1 PE=1 SV=2//1.61861e-14	KIL86312.1 initiation-specific alpha- -mannosyltransferase [Fusarium avenaceum]
KIL87189.1	3,4	sp|Q9LTS3|CKX3_ARATH Cytokinin dehydrogenase 3 OS=Arabidopsis thaliana GN=CKX3 PE=1 SV=1//2.48676e-11	EMT64382.1 Cytokinin dehydrogenase 3 [Fusarium oxysporum f. sp. cubense race 4]
KIL84574.1	3	sp|P51687|SUOX_HUMAN Sulfite oxidase, mitochondrial OS=Homo sapiens GN=SUOX PE=1 SV=2//2.58867e-56	KIL84574.1 sulfite oxidase [Fusarium avenaceum]
KIL95888.1	3	sp|Q70LM3|PEM2_PHLRA Manganese peroxidase 2 OS=Phlebia radiata GN=mnp2 PE=1 SV=1//1.27992e-22	KIL95888.1 manganese peroxidase 2 [Fusarium avenaceum]
KIL92274.1	3	-//-	KIL92274.1 hypothetical protein FAVG1_04683 [Fusarium avenaceum]
KIL94232.1	3	sp|P23903|E13B_BACCI Glucan endo-1,3-beta-glucosidase A1 OS=Bacillus circulans GN=glcA PE=1 SV=1//4.17426e-18	CZR38186.1 related to endo-1,3-beta-glucanase [Fusarium proliferatum ET1]
KIL86447.1	3,4	sp|Q12589|CP52K_CANMA Cytochrome P450 52A11 OS=Candida maltosa GN=CYP52A11 PE=2 SV=1//1.96337e-63	EMT72011.1 Cytochrome P450 52A13 [Fusarium oxysporum f. sp. cubense race 4]
KIL93996.1	3,4	sp|O74377|SULH1_SCHPO Probable sulfate permease C3H7.02 OS=Schizosaccharomyces pombe (strain 972 / ATCC 24843) GN=SPBC3H7.02 PE=3 SV=1//1.0842e-81	CZR37841.1 probable sulfate permease SutB [Fusarium proliferatum ET1]
KIL88204.1	3	sp|P15245|PH2M_TRICU Phenol 2-monooxygenase OS=Trichosporon cutaneum PE=1 SV=3//0	KIL88204.1 phenol 2-monooxygenase [Fusarium avenaceum]
KIL89374.1	3	sp|Q55E72|PKS1_DICDI Probable polyketide synthase 1 OS=Dictyostelium discoideum GN=stlA PE=1 SV=1//2.42418e-17	KIL89374.1 polyketide synthase [Fusarium avenaceum]
KIL93754.1	3	sp|O94343|YHMA_SCHPO Uncharacterized MFS-type transporter C1271.10c OS=Schizosaccharomyces pombe (strain 972 / ATCC 24843) GN=SPBC1271.10c PE=1 SV=1//6.72816e-56	SCV38546.1 related to HOL1-Putative substrate-H+ antiporter-unknown biological function [Fusarium fujikuroi]
KIL92188.1	3	-//-	KLO94713.1 gEgh 16 protein [Fusarium fujikuroi]
KIL89375.1	3,4	sp|Q9Y7D5|LOVF_ASPTE Lovastatin diketide synthase LovF OS=Aspergillus terreus GN=lovF PE=1 SV=1//0	KIL89375.1 polyketide synthase [Fusarium avenaceum]
KIL89371.1	3	sp|O94142|KO1_GIBFU Ent-kaurene oxidase OS=Gibberella fujikuroi GN=CYP503A1 PE=1 SV=1//2.00486e-42	KIL89371.1 cytochrome p450 protein [Fusarium avenaceum]
KIL89367.1	3	-//-	KIL89367.1 hypothetical protein FAVG1_07761 [Fusarium avenaceum]
KIL95759.1	3	sp|G5EB19|PPOA_EMENI Psi-producing oxygenase A OS=Emericella nidulans (strain FGSC A4 / ATCC 38163 / CBS 112.46 / NRRL 194 / M139) GN=ppoA PE=3 SV=1//0	CVL02021.1 related to linoleate diol synthase [Fusarium mangiferae]
KIL94326.1	3	sp|Q6ERE5|VIT12_ORYSJ Vacuolar iron transporter 1.2 OS=Oryza sativa subsp. japonica GN=VIT1.2 PE=3 SV=2//9.30446e-56	EMT66589.1 Vacuolar iron transporter 1.2 [Fusarium oxysporum f. sp. cubense race 4]
KIL88500.1	3,4	sp|P34229|FAS1_YARLI Fatty acid synthase subunit beta OS=Yarrowia lipolytica (strain CLIB 122 / E 150) GN=FAS1 PE=3 SV=2//0	KIL88500.1 fatty acid synthase beta subunit dehydratase [Fusarium avenaceum]
KIL89330.1	3	sp|Q12062|AFLK_ASPPA Versicolorin B synthase OS=Aspergillus parasiticus GN=vbs PE=1 SV=1//2.56802e-143	KPA36737.1 choline dehydrogenase [Fusarium langsethiae]
KIL87396.1	3	-//-	KIL87396.1 integral membrane protein [Fusarium avenaceum]
KIL89370.1	3	sp|O69787|BETC_RHIME Choline-sulfatase OS=Rhizobium meliloti (strain 1021) GN=betC PE=1 SV=2//2.35842e-28	CZR41654.1 probable choline-sulfatase [Fusarium proliferatum ET1]
KIL95658.1	3	-//-	KIL95658.1 hypothetical protein FAVG1_00396 [Fusarium avenaceum]
KIL86336.1	3	sp|P53048|MAL11_YEAST General alpha-glucoside permease OS=Saccharomyces cerevisiae (strain ATCC 204508 / S288c) GN=MAL11 PE=1 SV=1//9.17152e-49	RFN44213.1 maltose permease [Fusarium sp. FIESC_12]
KIL93997.1	3	sp|O74238|SNP1_PHANO Protein SnodProt1 OS=Phaeosphaeria nodorum (strain SN15 / ATCC MYA-4574 / FGSC 10173) GN=SNOG_13722 PE=2 SV=1//1.01857e-51	RGP78246.1 eliciting plant response [Fusarium longipes]
KIL93145.1	3	sp|Q08777|MCH5_YEAST Riboflavin transporter MCH5 OS=Saccharomyces cerevisiae (strain ATCC 204508 / S288c) GN=MCH5 PE=1 SV=2//4.35082e-31	CVL04956.1 related to monocarboxylate transporter 4 [Fusarium proliferatum]
KIL94182.1	3	sp|Q10138|YAS2_SCHPO CRAL-TRIO domain-containing protein C3H8.02 OS=Schizosaccharomyces pombe (strain 972 / ATCC 24843) GN=SPAC3H8.02 PE=1 SV=1//4.57718e-72	PTD08552.1 CRAL-TRIO domain-containing protein C3H8.02 [Fusarium culmorum]
KIL86331.1	3	-//-	SCO82614.1 related to OrfH-unknown, trichothecene gene cluster [Fusarium oxysporum]
KIL85985.1	3	sp|P43067|ADH1_CANAX Alcohol dehydrogenase 1 OS=Candida albicans GN=ADH1 PE=1 SV=1//1.13582e-43	RGP70119.1 alcohol dehydrogenase [Fusarium sporotrichioides]
KIL89297.1	3,4	sp|P53048|MAL11_YEAST General alpha-glucoside permease OS=Saccharomyces cerevisiae (strain ATCC 204508 / S288c) GN=MAL11 PE=1 SV=1//1.65219e-43	KIL89297.1 general alpha-glucoside permease [Fusarium avenaceum]
KIL94266.1	3	sp|P82611|ACON_CANAL Aconitate hydratase, mitochondrial OS=Candida albicans (strain SC5314 / ATCC MYA-2876) GN=ACO1 PE=1 SV=2//0	PCD29927.1 aconitate hydratase [Fusarium graminearum]
KIL95760.1	3,4	sp|P39992|YEC3_YEAST Uncharacterized protein YEL023C OS=Saccharomyces cerevisiae (strain ATCC 204508 / S288c) GN=YEL023C PE=4 SV=1//1.38119e-33	RFN49317.1 short chain dehydrogenase reductase family [Fusarium sp. FIESC_12]
KIL88563.1	3,4	sp|Q00808|HETE1_PODAS Vegetative incompatibility protein HET-E-1 OS=Podospora anserina GN=HET-E1 PE=3 SV=1//3.00664e-06	RFN51359.1 putative vegetative incompatibility protein het-e-1 [Fusarium sp. FIESC_12]
KIL90295.1	3	sp|Q6MYX6|QUTD_ASPFU Probable quinate permease OS=Neosartorya fumigata (strain ATCC MYA-4609 / Af293 / CBS 101355 / FGSC A1100) GN=qutD PE=3 SV=1//3.12698e-107	KIL90295.1 quinate permease [Fusarium avenaceum]
KIL88657.1	3	-//-	KIL88657.1 hypothetical protein FAVG1_07904 [Fusarium avenaceum]
KIL88587.1	3	sp|O94343|YHMA_SCHPO Uncharacterized MFS-type transporter C1271.10c OS=Schizosaccharomyces pombe (strain 972 / ATCC 24843) GN=SPBC1271.10c PE=1 SV=1//5.59778e-42	CZR47939.1 related to HOL1, putative substrate-H+ antiporter [Fusarium proliferatum ET1]
KIL93687.1	3	sp|Q304B9|NCASE_ARATH Neutral ceramidase OS=Arabidopsis thaliana GN=At2g38010 PE=3 SV=1//4.41852e-142	KPA36015.1 alkaline ceramidase [Fusarium langsethiae]
KIL88469.1	3	-//-	KIL88469.1 hypothetical protein FAVG1_08550 [Fusarium avenaceum]
KIL89373.1	3	sp|Q9S7L2|MYB98_ARATH Transcription factor MYB98 OS=Arabidopsis thaliana GN=MYB98 PE=2 SV=1//7.83221e-08	RGP61314.1 chalcone synthase b [Fusarium sporotrichioides]
KIL94307.1	3	sp|Q10286|ITR1_SCHPO Myo-inositol transporter 1 OS=Schizosaccharomyces pombe (strain 972 / ATCC 24843) GN=itr1 PE=3 SV=1//6.23009e-114	RKK68662.1 Myo-inositol transporter 1 [Fusarium oxysporum]
KIL88381.1	3	sp|O74959|YJCD_SCHPO Uncharacterized oxidoreductase C736.13 OS=Schizosaccharomyces pombe (strain 972 / ATCC 24843) GN=SPCC736.13 PE=3 SV=1//7.59893e-47	SCO87851.1 related to alcohol dehydrogenase homolog Bli-4 [Fusarium oxysporum]
KIL87759.1	3	sp|P53048|MAL11_YEAST General alpha-glucoside permease OS=Saccharomyces cerevisiae (strain ATCC 204508 / S288c) GN=MAL11 PE=1 SV=1//2.06141e-37	CVL03366.1 probable maltose permease (MalP) [Fusarium mangiferae]
KIL89372.1	3	sp|I1RNL0|C9MT2_GIBZE Sphingolipid C9-methyltransferase 2 OS=Gibberella zeae (strain PH-1 / ATCC MYA-4620 / FGSC 9075 / NRRL 31084) GN=MT2 PE=3 SV=1//0	KPA35846.1 cyclopropane-fatty-acyl-phospholipid synthase [Fusarium langsethiae]
KIL87232.1	3	-//-	KIL87232.1 hypothetical protein FAVG1_09790 [Fusarium avenaceum]
KIL93675.1	3	sp|A4FSH5|PHIA_ASPFM Cell wall protein phiA OS=Neosartorya fumigata GN=phiA PE=1 SV=1//5.40169e-38	KLO79640.1 cell wall protein PhiA [Fusarium fujikuroi]
KIL93428.1	3,4	sp|Q5BD77|HOGA1_EMENI Probable 4-hydroxy-2-oxoglutarate aldolase, mitochondrial OS=Emericella nidulans (strain FGSC A4 / ATCC 38163 / CBS 112.46 / NRRL 194 / M139) GN=AN1503 PE=1 SV=1//7.94496e-102	ENH73932.1 Putative 4-hydroxy-2-oxoglutarate aldolase, mitochondrial [Fusarium oxysporum f. sp. cubense race 1]
KIL89100.1	3,4	sp|G3XD94|UGND_PSEAE UDP-N-acetyl-D-glucosamine 6-dehydrogenase OS=Pseudomonas aeruginosa (strain ATCC 15692 / PAO1 / 1C / PRS 101 / LMG 12228) GN=wbpA PE=1 SV=1//8.83868e-49	SCO82918.1 related to NDP-N-acetyl-D-galactosaminuronic acid dehydrogenase [Fusarium oxysporum]
KIL90349.1	3	sp|Q6RWA9|AT1A_TAESO Sodium/potassium-transporting ATPase subunit alpha OS=Taenia solium PE=2 SV=1//4.63901e-160	KIL90349.1 sodium potassium-transporting atpase subunit alpha [Fusarium avenaceum]
KIL94222.1	3	-//-	SCO75947.1 related to integral membrane protein PTH11 [Fusarium oxysporum]
KIL90210.1	3,4	sp|O94467|OYEC_SCHPO Putative NADPH dehydrogenase C23G7.10c OS=Schizosaccharomyces pombe (strain 972 / ATCC 24843) GN=SPBC23G7.10c PE=3 SV=1//8.31396e-76	CRG89150.1 putative transporter MCH4 [Talaromyces islandicus]
KIL88419.1	3,4	sp|Q873E8|GSHR_NEUCR Glutathione reductase OS=Neurospora crassa (strain ATCC 24698 / 74-OR23-1A / CBS 708.71 / DSM 1257 / FGSC 987) GN=gtr-1 PE=3 SV=1//0	RKL27297.1 Glutathione reductase [Fusarium proliferatum]
KIL90296.1	3	sp|P34054|INDA1_HYPAT Amino-acid permease inda1 OS=Hypocrea atroviridis GN=inda1 PE=2 SV=1//0	EMT62718.1 Amino-acid permease inda1 [Fusarium oxysporum f. sp. cubense race 4]
KIL92256.1	3	-//-	RFN53961.1 copper resistance protein crd2 [Fusarium sp. FIESC_12]
KIL87442.1	3	sp|O94343|YHMA_SCHPO Uncharacterized MFS-type transporter C1271.10c OS=Schizosaccharomyces pombe (strain 972 / ATCC 24843) GN=SPBC1271.10c PE=1 SV=1//1.17044e-56	PTD08196.1 putative MFS-type transporter, partial [Fusarium culmorum]
KIL89741.1	3,4	sp|A4FV08|GNPI1_BOVIN Glucosamine-6-phosphate isomerase 1 OS=Bos taurus GN=GNPDA1 PE=2 SV=1//6.8431e-124	KIL89741.1 glucosamine-6-phosphate deaminase [Fusarium avenaceum]
KIL95538.1	3	sp|Q2TBM9|SRAC1_BOVIN Protein SERAC1 OS=Bos taurus GN=SERAC1 PE=2 SV=1//3.50983e-08	ENH70398.1 Protein SERAC1 [Fusarium oxysporum f. sp. cubense race 1]
KIL88199.1	3	sp|P36033|FRE2_YEAST Ferric/cupric reductase transmembrane component 2 OS=Saccharomyces cerevisiae (strain ATCC 204508 / S288c) GN=FRE2 PE=1 SV=1//3.82905e-29	RGP78968.1 ferric-chelate reductase [Fusarium longipes]
KIL88579.1	3	-//-	KIL88579.1 hypothetical protein FAVG1_07824 [Fusarium avenaceum]
KIL93944.1	3	-//-	KIL93944.1 oxidoreductase [Fusarium avenaceum]
KIL88420.1	3	-//-	KIL88420.1 hypothetical protein FAVG1_08500 [Fusarium avenaceum]
KIL92922.1	3	-//-	KIL92922.1 hypothetical protein FAVG1_04103 [Fusarium avenaceum]
KIL83729.1	3	-//-	KIL83729.1 hypothetical protein FAVG1_13079 [Fusarium avenaceum]
KIL95250.1	3	sp|P23622|CYS14_NEUCR Sulfate permease 2 OS=Neurospora crassa (strain ATCC 24698 / 74-OR23-1A / CBS 708.71 / DSM 1257 / FGSC 987) GN=cys-14 PE=2 SV=3//0	KIL95250.1 family sulfate permease [Fusarium avenaceum]
KIL87695.1	3	sp|P76536|YFEX_ECOLI Probable deferrochelatase/peroxidase YfeX OS=Escherichia coli (strain K12) GN=yfeX PE=1 SV=2//6.79816e-43	KIL87695.1 iron-dependent peroxidase [Fusarium avenaceum]
KIL86418.1	3,4	-//-	RGP64277.1 putative gegh 16 [Fusarium sporotrichioides]
KIL89340.1	3	sp|Q4WAW8|FTME_ASPFU Fumitremorgin C synthase OS=Neosartorya fumigata (strain ATCC MYA-4609 / Af293 / CBS 101355 / FGSC A1100) GN=ftmP450-2 PE=3 SV=1//6.83343e-43	CVK96639.1 related to O-methylsterigmatocystin oxidoreductase [Fusarium mangiferae]
KIL88463.1	3	-//-	KIL88463.1 hypothetical protein FAVG1_08543 [Fusarium avenaceum]
KIL87166.1	3	sp|P77526|YFCG_ECOLI Disulfide-bond oxidoreductase YfcG OS=Escherichia coli (strain K12) GN=yfcG PE=1 SV=1//9.77252e-38	PVI05792.1 glutathione S-transferase [Periconia macrospinosa]
KIL85361.1	3	sp|P54420|ASNB_BACSU Asparagine synthetase [glutamine-hydrolyzing] 1 OS=Bacillus subtilis (strain 168) GN=asnB PE=1 SV=2//6.56463e-54	RGP63893.1 asparagine synthase [Fusarium sporotrichioides]
KIL94174.1	3	sp|O90760|V031_FOWPN Putative ankyrin repeat protein FPV031 OS=Fowlpox virus (strain NVSL) GN=ANK3 PE=3 SV=1//3.67036e-06	KIL94174.1 ankyrin repeat protein [Fusarium avenaceum]
KIL88176.1	3	-//-	KIL88176.1 hypothetical protein FAVG1_08254 [Fusarium avenaceum]
KIL86115.1	3	sp|Q5RGL7|SMY2B_DANRE N-lysine methyltransferase SMYD2-B OS=Danio rerio GN=smyd2b PE=2 SV=2//1.86055e-06	KFX45398.1 Egl nine like 1 [Talaromyces marneffei PM1]
KIL88671.1	3	sp|Q80V70|MEGF6_MOUSE Multiple epidermal growth factor-like domains protein 6 OS=Mus musculus GN=Megf6 PE=2 SV=3//7.2602e-06	ENH65811.1 Multiple epidermal growth factor-like domains protein 6 [Fusarium oxysporum f. sp. cubense race 1]
KIL91517.1	3	-//-	KIL91517.1 hypothetical protein FAVG1_05133 [Fusarium avenaceum]
KIL86201.1	3,4	sp|Q8CEE7|RDH13_MOUSE Retinol dehydrogenase 13 OS=Mus musculus GN=Rdh13 PE=1 SV=1//5.80491e-25	ENH75644.1 WW domain-containing oxidoreductase [Fusarium oxysporum f. sp. cubense race 1]
KIL85428.1	3	sp|Q08280|BSC6_YEAST Bypass of stop codon protein 6 OS=Saccharomyces cerevisiae (strain ATCC 204508 / S288c) GN=BSC6 PE=1 SV=1//1.64092e-07	RGP69254.1 mfs transporter [Fusarium longipes]
KIL95689.1	3	sp|P11636|QAY_NEUCR Quinate permease OS=Neurospora crassa (strain ATCC 24698 / 74-OR23-1A / CBS 708.71 / DSM 1257 / FGSC 987) GN=qa-y PE=3 SV=2//1.32737e-79	ENH70264.1 Quinate permease [Fusarium oxysporum f. sp. cubense race 1]
KIL94663.1	3	-//-	RGP64509.1 fatty-acid amide hydrolase [Fusarium sporotrichioides]
KIL85518.1	3	-//-	KIL85518.1 hypothetical protein FAVG1_11012 [Fusarium avenaceum]
KIL91932.1	3	sp|P50167|ARDH_PICST D-arabinitol 2-dehydrogenase [ribulose-forming] OS=Scheffersomyces stipitis (strain ATCC 58785 / CBS 6054 / NBRC 10063 / NRRL Y-11545) GN=ARDH PE=2 SV=1//9.20953e-66	KIL91932.1 gluconate 5-dehydrogenase [Fusarium avenaceum]
KIL85255.1	3	-//-	SCO05912.1 related to integral membrane protein PTH11 [Fusarium fujikuroi]
KIL85302.1	3	sp|O59746|YN2B_SCHPO Uncharacterized transcriptional regulatory protein C530.11c OS=Schizosaccharomyces pombe (strain 972 / ATCC 24843) GN=SPBC530.11c PE=1 SV=1//9.13865e-14	ENH68093.1 Putative dioxygenase subunit alpha yeaW [Fusarium oxysporum f. sp. cubense race 1]
KIL85787.1	3	sp|P04842|ALOX1_PICPG Alcohol oxidase 1 OS=Komagataella pastoris (strain GS115 / ATCC 20864) GN=AOX1 PE=1 SV=2//0	KIL85787.1 alcohol oxidase [Fusarium avenaceum]
KIL89266.1	3	sp|Q4JCA7|PGMI_SULAC Bifunctional phosphoglucose/phosphomannose isomerase OS=Sulfolobus acidocaldarius (strain ATCC 33909 / DSM 639 / JCM 8929 / NBRC 15157 / NCIMB 11770) GN=Saci_0151 PE=3 SV=1//6.62794e-06	ROO62626.1 glucose/mannose-6-phosphate isomerase [Micromonospora sp. Llam0]
KIL94109.1	3	sp|P07921|LACP_KLULA Lactose permease OS=Kluyveromyces lactis (strain ATCC 8585 / CBS 2359 / DSM 70799 / NBRC 1267 / NRRL Y-1140 / WM37) GN=LAC12 PE=3 SV=1//1.05705e-51	CVL08297.1 related to hexose transporter protein [Fusarium mangiferae]
KIL85945.1	3	sp|P38680|MTR_NEUCR N amino acid transport system protein OS=Neurospora crassa (strain ATCC 24698 / 74-OR23-1A / CBS 708.71 / DSM 1257 / FGSC 987) GN=mtr PE=3 SV=2//1.23836e-24	KIL85945.1 n amino acid transport system protein [Fusarium avenaceum]
KIL87494.1	3,4	sp|D4AX63|LIPA_ARTBC Lipase A OS=Arthroderma benhamiae (strain ATCC MYA-4681 / CBS 112371) GN=ARB_00790 PE=3 SV=1//2.60771e-69	SCO90303.1 related to lipase 1 [Fusarium oxysporum]
KIL93322.1	3	sp|Q96WM9|LAC2_BOTFU Laccase-2 OS=Botryotinia fuckeliana GN=lcc2 PE=2 SV=1//6.99946e-78	KIL93322.1 laccase precursor [Fusarium avenaceum]
KIL94432.1	3	-//-	KIL94432.1 hypothetical protein FAVG1_02996 [Fusarium avenaceum]
KIL94664.1	3	sp|P39992|YEC3_YEAST Uncharacterized protein YEL023C OS=Saccharomyces cerevisiae (strain ATCC 204508 / S288c) GN=YEL023C PE=4 SV=1//2.74173e-09	RGP64510.1 peptidoglycan-containing protein [Fusarium sporotrichioides]
KIL94288.1	3	-//-	XP_018762414.1 carboxymethylenebutenolidase [Fusarium verticillioides 7600]
KIL94149.1	3	sp|Q937L4|CPNA_COMTE Cyclopentanol dehydrogenase OS=Comamonas testosteroni GN=cpnA PE=3 SV=1//3.13553e-41	PTD08450.1 3-oxoacyl-[acyl-carrier-protein] reductase FabG [Fusarium culmorum]
KIL88564.1	3	-//-	RFN51360.1 putative modin [Fusarium sp. FIESC_12]
KIL93994.1	3	sp|O34714|OXDC_BACSU Oxalate decarboxylase OxdC OS=Bacillus subtilis (strain 168) GN=oxdC PE=1 SV=1//1.66374e-143	KIL93994.1 oxalate decarboxylase [Fusarium avenaceum]
KIL89364.1	3,4	-//-	KIL89364.1 hypothetical protein FAVG1_07758 [Fusarium avenaceum]
KIL87826.1	3	sp|Q9SG02|RDR6_ARATH RNA-dependent RNA polymerase 6 OS=Arabidopsis thaliana GN=RDR6 PE=1 SV=1//7.00125e-17	CZR49488.1 related to qde-1 RNA-dependent RNA polymerase (RdRP) [Fusarium proliferatum ET1]
KIL94688.1	3	-//-	RFN54824.1 conidiation-specific expression protein [Fusarium sp. FIESC_12]
KIL95972.1	3	sp|P15802|AAAA_PENCH Acyl-coenzyme A:6-aminopenicillanic-acid-acyltransferase 40 kDa form OS=Penicillium chrysogenum GN=penDE PE=1 SV=1//2.65301e-66	KIL95972.1 isopenicillin-n n-acyltransferase [Fusarium avenaceum]
KIL84026.1	3	-//-	KIL84026.1 Nudix [Fusarium avenaceum]
KIL92174.1	3,4	sp|P96597|YDBB_BACSU Uncharacterized protein YdbB OS=Bacillus subtilis (strain 168) GN=ydbB PE=3 SV=1//7.97135e-16	RFN49473.1 cupin 2 conserved barrel protein [Fusarium sp. FIESC_12]
KIL84445.1	3	-//-	RFN55570.1 hemerythrin hhe cation binding domain-containing protein [Fusarium sp. FIESC_12]
KIL86676.1	3	sp|D4AUF4|WSCD2_ARTBC WSC domain-containing protein ARB_07870 OS=Arthroderma benhamiae (strain ATCC MYA-4681 / CBS 112371) GN=ARB_07870 PE=1 SV=1//3.44879e-66	KIL86676.1 l-ascorbate peroxidase peroxisomal [Fusarium avenaceum]
KIL89350.1	3	sp|Q99L13|3HIDH_MOUSE 3-hydroxyisobutyrate dehydrogenase, mitochondrial OS=Mus musculus GN=Hibadh PE=1 SV=1//3.92014e-50	CVK96628.1 related to 3-hydroxyisobutyrate dehydrogenase [Fusarium mangiferae]
KIL83800.1	3	-//-	KIL83800.1 hypothetical protein FAVG1_12949 [Fusarium avenaceum]
KIL87179.1	3	sp|P0ABR7|YEAW_ECOLI Putative dioxygenase subunit alpha YeaW OS=Escherichia coli (strain K12) GN=yeaW PE=3 SV=1//3.30093e-35	KIL87179.1 cytochrome p450 oxidoreductase [Fusarium avenaceum]
KIL94415.1	3	sp|Q9URX1|YLX5_SCHPO UNC93-like protein C922.05c OS=Schizosaccharomyces pombe (strain 972 / ATCC 24843) GN=SPAC922.05c PE=3 SV=1//2.81661e-118	RGP79059.1 duf895 domain membrane protein [Fusarium longipes]
KIL90502.1	3	sp|P42041|ALDH_ALTAL Aldehyde dehydrogenase OS=Alternaria alternata GN=ALTA10 PE=1 SV=2//1.33273e-175	XP_018238974.1 aldehyde dehydrogenase (NAD+) [Fusarium oxysporum f. sp. lycopersici 4287]
KIL83575.1	3	-//-	PTB77135.1 GPCR, PTH11-type [Trichoderma longibrachiatum ATCC 18648]
KIL90275.1	3	-//-	KIL90275.1 hypothetical protein FAVG1_06005 [Fusarium avenaceum]
KIL91084.1	3	sp|Q9P380|PTR2_SCHPO Probable peptide transporter ptr2 OS=Schizosaccharomyces pombe (strain 972 / ATCC 24843) GN=ptr2 PE=1 SV=1//1.47444e-118	KIL91084.1 pot family proton-dependent oligopeptide transporter [Fusarium avenaceum]
KIL87641.1	3	sp|P86491|6HN3M_PSEFL 6-hydroxynicotinate 3-monooxygenase OS=Pseudomonas fluorescens PE=1 SV=1//1.39128e-36	RGP80074.1 salicylate hydroxylase [Fusarium longipes]
KIL88783.1	3	sp|P50166|ARDH_CANTR D-arabinitol 2-dehydrogenase [ribulose-forming] OS=Candida tropicalis GN=ARD PE=1 SV=1//2.45863e-39	CZR47670.1 related to D-arabinitol 2-dehydrogenase [Fusarium proliferatum ET1]
KIL86814.1	3	sp|Q45604|YYCR_BACSU Uncharacterized zinc-type alcohol dehydrogenase-like protein YycR OS=Bacillus subtilis (strain 168) GN=yycR PE=3 SV=1//2.76076e-91	KIL86814.1 alcohol dehydrogenase [Fusarium avenaceum]
KIL85272.1	3	sp|O74923|YJ7D_SCHPO Uncharacterized transporter C757.13 OS=Schizosaccharomyces pombe (strain 972 / ATCC 24843) GN=SPCC757.13 PE=3 SV=1//8.8415e-59	ENH74330.1 Quinate permease [Fusarium oxysporum f. sp. cubense race 1]
KIL93192.1	3	sp|O04130|SERA2_ARATH D-3-phosphoglycerate dehydrogenase 2, chloroplastic OS=Arabidopsis thaliana GN=PGDH2 PE=1 SV=2//3.03527e-122	KIL93192.1 phosphoglycerate dehydrogenase [Fusarium avenaceum]
KIL88578.1	3	-//-	SCO28075.1 related to tenascin X precursor [Fusarium fujikuroi]
KIL85596.1	3	-//-	RGP68000.1 zn2cys6 transcription regulator [Fusarium longipes]
KIL90232.1	3	-//-	KPA36480.1 integral membrane protein [Fusarium langsethiae]
KIL94920.1	3	sp|P39353|YJHC_ECOLI Uncharacterized oxidoreductase YjhC OS=Escherichia coli (strain K12) GN=yjhC PE=3 SV=2//1.06033e-10	RFN53052.1 oxidoreductase [Fusarium sp. FIESC_12]
KIL86778.1	3	-//-	KIL86778.1 hypothetical protein FAVG1_10034 [Fusarium avenaceum]
KIL85606.1	3	-//-	KIL85606.1 hypothetical protein FAVG1_11100 [Fusarium avenaceum]
KIL93473.1	3	sp|Q92259|SREP_PENCH GATA factor SREP OS=Penicillium chrysogenum GN=SREP PE=3 SV=1//4.1656e-10	RFN45263.1 putative siderophore regulation protein (gata factor) [Fusarium sp. FIESC_12]
KIL85025.1	3	sp|P41943|GPR1_YARLI Glyoxylate pathway regulator OS=Yarrowia lipolytica (strain CLIB 122 / E 150) GN=GPR1 PE=1 SV=3//4.51009e-21	RGP60216.1 putative fun34-transmembrane protein involved in ammonia production [Fusarium sporotrichioides]
KIL95756.1	3	sp|Q10499|AIF1_SCHPO Apoptosis-inducing factor 1 OS=Schizosaccharomyces pombe (strain 972 / ATCC 24843) GN=aif1 PE=3 SV=3//1.56798e-132	XP_023431156.1 related to putidaredoxin reductase [Fusarium fujikuroi IMI 58289]
KIL85705.1	3	sp|P11551|FUCP_ECOLI L-fucose-proton symporter OS=Escherichia coli (strain K12) GN=fucP PE=1 SV=3//7.31244e-49	KIL85705.1 mfs fhs l-fucose permease [Fusarium avenaceum]
KIL92198.1	4	sp|O34371|YTET_BACSU Putative oxidoreductase YteT OS=Bacillus subtilis (strain 168) GN=yteT PE=2 SV=1//2.37631e-58	KIL92198.1 oxidoreductase [Fusarium avenaceum]
KIL86397.1	4	sp|Q03149|WA_EMENI Conidial yellow pigment biosynthesis polyketide synthase OS=Emericella nidulans (strain FGSC A4 / ATCC 38163 / CBS 112.46 / NRRL 194 / M139) GN=wA PE=1 SV=2//0	KIL86397.1 polyketide synthetase [Fusarium avenaceum]
KIL85469.1	4	sp|Q00808|HETE1_PODAS Vegetative incompatibility protein HET-E-1 OS=Podospora anserina GN=HET-E1 PE=3 SV=1//4.27208e-13	CZR49276.1 related to small s protein [Fusarium proliferatum ET1]
KIL84575.1	4	sp|O13289|CATA_CANAL Peroxisomal catalase OS=Candida albicans (strain SC5314 / ATCC MYA-2876) GN=CTA1 PE=2 SV=4//3.11586e-120	KIL84575.1 catalase [Fusarium avenaceum]
KIL89245.1	4	-//-	SCV52338.1 related to tol protein [Fusarium fujikuroi]
KIL87828.1	4	sp|Q4WVN4|NRPS8_ASPFU Nonribosomal peptide synthetase 8 OS=Neosartorya fumigata (strain ATCC MYA-4609 / Af293 / CBS 101355 / FGSC A1100) GN=NRPS8 PE=3 SV=1//2.39258e-08	KIL87828.1 non-ribosomal peptide synthetase [Fusarium avenaceum]
KIL90704.1	4	sp|Q00808|HETE1_PODAS Vegetative incompatibility protein HET-E-1 OS=Podospora anserina GN=HET-E1 PE=3 SV=1//2.45147e-29	SCV47011.1 related to ankyrin 3 [Fusarium fujikuroi]
KIL90265.1	4	sp|Q00808|HETE1_PODAS Vegetative incompatibility protein HET-E-1 OS=Podospora anserina GN=HET-E1 PE=3 SV=1//2.41474e-47	RGP58943.1 vegetative incompatibility protein het-e-1 [Fusarium sporotrichioides]
KIL89492.1	4	-//-	ENH71022.1 Putative AAA family ATPase y4kL [Fusarium oxysporum f. sp. cubense race 1]
KIL94775.1	4	-//-	KYK54689.1 Fibronectin type III domain protein [Drechmeria coniospora]
KIL93328.1	4	sp|P39009|DUN1_YEAST DNA damage response protein kinase DUN1 OS=Saccharomyces cerevisiae (strain ATCC 204508 / S288c) GN=DUN1 PE=1 SV=1//9.81016e-58	RFN44138.1 serine/threonine-protein kinase chk2 (cds1) [Fusarium sp. FIESC_12]
KIL89987.1	4	sp|Q08234|YO075_YEAST Uncharacterized ABC transporter ATP-binding protein/permease YOL075C OS=Saccharomyces cerevisiae (strain ATCC 204508 / S288c) GN=YOL075C PE=1 SV=3//1.26592e-55	RFN55009.1 atpase [Fusarium sp. FIESC_12]
KIL94326.1	4	sp|Q6ERE5|VIT12_ORYSJ Vacuolar iron transporter 1.2 OS=Oryza sativa subsp. japonica GN=VIT1.2 PE=3 SV=2//9.30446e-56	EMT66589.1 Vacuolar iron transporter 1.2 [Fusarium oxysporum f. sp. cubense race 4]
KIL91517.1	4	-//-	KIL91517.1 hypothetical protein FAVG1_05133 [Fusarium avenaceum]
KIL87291.1	4	-//-	KIL87291.1 hypothetical protein FAVG1_09849 [Fusarium avenaceum]
KIL95230.1	4	-//-	KIL95230.1 hypothetical protein FAVG1_02163 [Fusarium avenaceum]
KIL84592.1	4	sp|G5E8K5|ANK3_MOUSE Ankyrin-3 OS=Mus musculus GN=Ank3 PE=1 SV=1//1.49843e-23	KIL84592.1 ankyrin repeat-containing [Fusarium avenaceum]
KIL87093.1	4	-//-	RGP81613.1 zinc finger domain-containing cchc-type [Fusarium longipes]
KIL93144.1	4	sp|Q4I0C5|RDR1_GIBZE Protein RDR1 OS=Gibberella zeae (strain PH-1 / ATCC MYA-4620 / FGSC 9075 / NRRL 31084) GN=RDR1 PE=3 SV=1//0	KIL93144.1 protein rdr1 [Fusarium avenaceum]
KIL92404.1	4	sp|Q00808|HETE1_PODAS Vegetative incompatibility protein HET-E-1 OS=Podospora anserina GN=HET-E1 PE=3 SV=1//3.77576e-77	XP_023434052.1 related to beta transducin-like protein [Fusarium fujikuroi IMI 58289]
KIL92615.1	4	-//-	KIL92615.1 hypothetical protein FAVG1_03795 [Fusarium avenaceum]
KIL86406.1	4	-//-	KIL86406.1 nucleoside phosphorylase domain [Fusarium avenaceum]
KIL83874.1	4	sp|Q49W60|2NPD_STAS1 Probable nitronate monooxygenase OS=Staphylococcus saprophyticus subsp. saprophyticus (strain ATCC 15305 / DSM 20229) GN=SSP1854 PE=3 SV=1//3.78152e-10	RFN55069.1 2-nitropropane dioxygenase [Fusarium sp. FIESC_12]
KIL84309.1	4	sp|Q6RWA9|AT1A_TAESO Sodium/potassium-transporting ATPase subunit alpha OS=Taenia solium PE=2 SV=1//4.63901e-160	KIL90349.1 sodium potassium-transporting atpase subunit alpha [Fusarium avenaceum]
KIL86771.1	4	-//-	RGP67239.1 alpha beta-hydrolase [Fusarium sporotrichioides]
KIL94416.1	4	sp|D4B3R7|A3106_ARTBC Extracellular protein ARB_03106 OS=Arthroderma benhamiae (strain ATCC MYA-4681 / CBS 112371) GN=ARB_03106 PE=1 SV=1//2.40048e-84	KIL94416.1 hypothetical protein FAVG1_02979 [Fusarium avenaceum]
KIL86170.1	4	sp|Q00808|HETE1_PODAS Vegetative incompatibility protein HET-E-1 OS=Podospora anserina GN=HET-E1 PE=3 SV=1//4.72937e-11	PTD08822.1 Vegetative incompatibility protein HET-E-1 [Fusarium culmorum]
KIL87231.1	4	sp|A6SBW7|NPIIA_BOTFB Neutral protease 2 homolog SNOG_10522 OS=Botryotinia fuckeliana (strain B05.10) GN=BC1G_10098 PE=3 SV=1//5.8526e-54	CVL13721.1 related to Neutral protease 2 homolog SNOG_10522 [Fusarium proliferatum]
KIL89429.1	4	sp|Q06833|YP091_YEAST Uncharacterized PH domain-containing protein YPR091C OS=Saccharomyces cerevisiae (strain ATCC 204508 / S288c) GN=YPR091C PE=1 SV=1//2.09396e-70	KLP15465.1 homeobox protein [Fusarium fujikuroi]
KIL90108.1	4	sp|Q9P6J3|MALT_SCHPO Alpha-glucosidase OS=Schizosaccharomyces pombe (strain 972 / ATCC 24843) GN=mal1 PE=2 SV=1//0	CVL03315.1 probable alpha-glucosidase (maltase) [Fusarium proliferatum]
KIL90031.1	4	-//-	RFN55045.1 transcription factor [Fusarium sp. FIESC_12]
KIL84602.1	4	-//-	ROT39118.1 HET-domain-containing protein [Sodiomyces alkalinus F11]
KIL83903.1	4	sp|Q00808|HETE1_PODAS Vegetative incompatibility protein HET-E-1 OS=Podospora anserina GN=HET-E1 PE=3 SV=1//1.10173e-29	RGP81028.1 wd40 repeat [Fusarium longipes]
